# Supplementary material for: UK healthcare staff experiences and perceptions of a mass casualty terrorist incident response: a mixed-methods study
Source: HighWire-hosted journal article supplement (doi:10.1136/emermed-2019-208966), 2020-11-11
Supplement: emermed-2019-208966supp002_data_supplement.pdf [file emermed-2019-208966supp002_data_supplement.pdf]

**SUPPLEMENTAL MATERIAL****10.1136/emered-2019-208966**

Abstract in Russian

**Введение.** Системное обучение, основанное на анализе действий в серьезных инцидентах, является важным элементом повышения готовности к реагированию на любые будущие инциденты. Обмен полезным опытом и неудачами стимулирует дальнейшие действия по повышению готовности и предотвращает повторение ошибок.

**Метод:** Это исследование, использующее конвергентно-параллельный смешанный метод, включает данные полученные путем он-лайн опроса и индивидуальных интервью с медицинским персоналом, который принимал прямое участие в трех террористических инцидентах в Великобритании в 2017 году (атака на Вестминстерском мосту, взрыв в концертном комплексе Манчестерская Арена и атака на Лондонском мосту), с целью чтобы проанализировать ограничения в действиях и поделиться передовым опытом.

**Результаты:** Самоотверженность сотрудников Национальной Системы Здравоохранения (NHS), наличие персонала и согласованная работа различных медицинских команд были наиболее часто упоминаемыми факторами, способствующими эффективному реагированию. Эффективная координация между различными медицинскими командами и функциональный план крупных инцидентов способствовали эффективным действиям. Быстрый доступ к продуктам крови, за счет размещения банка крови в отделении неотложной помощи, лечение пострадавших детей и родителей в одном отделении и координированное использование ресурсов между разными травматологическими центрами были признаны очень эффективными инновационными методами. Вклад недавних учений по обеспечению готовности к чрезвычайным ситуациям (НЕРЕ) в области здравоохранения был отмечен с точки зрения подготовки как госпиталей, так и отдельных сотрудников к реагированию. Проблемы включали сообщение между службами скорой помощи и больницами, трудности с идентификацией и отслеживанием пациентов, а также регулирование возвращения к «нормальному» режиму работы после инцидента. Наиболее часто упоминаемой клинической проблемой было отсутствие доступных клинических протоколов по лечению баллистических травм. Была выявлена потребность в психологической поддержке для прямого и поддерживающего персонала.

**Обсуждение:** Сообщение между агентствами и обмен информацией являются наиболее частыми повторяющимися проблемами в инцидентах с массовыми жертвами. Недавние учения (НЕРЕ), которые позволили командам, междисциплинарным группам и различным агентствам практиковаться в реагировании на похожие моделированные инциденты, были важными и способствовали эффективным действиям во время реального реагирования. Медицинскому персоналу, реагирующему на инциденты с массовыми жертвами, должна предоставляться немедленная и последующая психосоциальная поддержка.

**DISCLAIMER:** This abstract has been translated and adapted from the original English-language content. Translated content is provided on an "as is" basis. Translation accuracy or reliability is not guaranteed or implied. BMJ is not responsible for any errors and omissions arising from translation to the fullest extent permitted by law, BMJ shall not incur any liability, including without limitation, liability for damages, arising from the translated text.
